# Supplementary material for: Polymer microcapsules loaded with Ag nanocatalyst as active microreactors
Source: Royal Society of Chemistry journal article supplement (doi:10.1039/c4ta00606b), 2014-01-01
Supplement: c4ta00606b1.pdf [file c4ta00606b1.pdf]

## Supplementary Information

### Polymer microcapsules loaded with Ag nanocatalyst as active microreactors†

Marta Horecha,<sup>a</sup> Elisabeth Kaul,<sup>a</sup> Andriy Horechyy\*<sup>a</sup> and Manfred Stamm\*<sup>a,b</sup>

5

<sup>a</sup> Leibniz-Institute für Polymerforschung Dresden e.V., Hohe Strasse 6, 01069 Dresden, Germany

Fax: +49 (0)351 4658 281; Tel: +49 (0) 4658 324; E-mail: [horechyy@ipfd.de](mailto:horechyy@ipfd.de); [stamm@ipfd.de](mailto:stamm@ipfd.de)

<sup>b</sup> Department of Chemistry, Technische Universität Dresden, 01069 Dresden, Germany

10

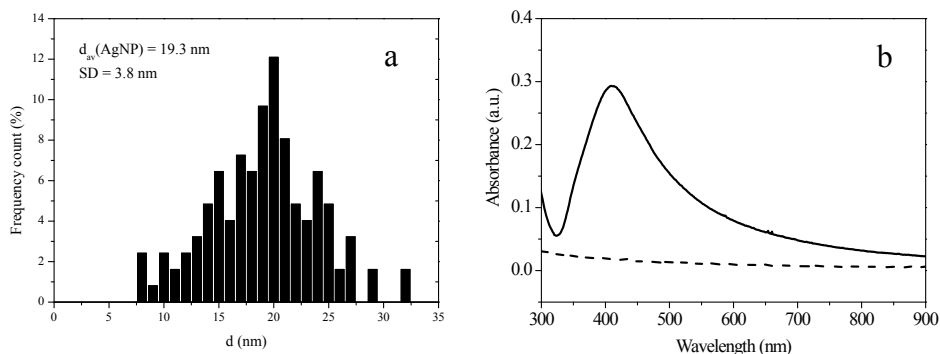

15

20

**Fig. S1** (a) Size distribution histogram of AgNP immobilized SiO<sub>2</sub> and (b) UV-Vis spectra of bare SiO<sub>2</sub> particles (dash line) and Ag/SiO<sub>2</sub> (solid line) prepared by borohydride reduction of silver acetate in the presence of SiO<sub>2</sub> particles in THF/H<sub>2</sub>O mixture (see details in manuscript).

25

30

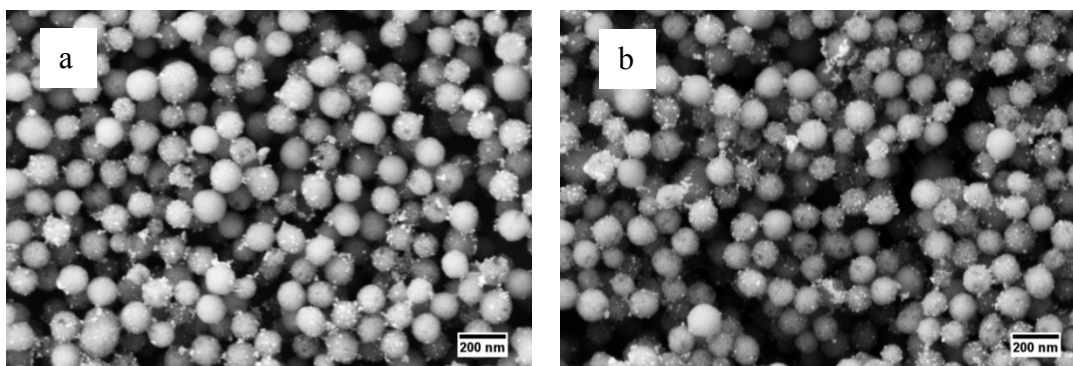

**Fig. S2** SEM images of Ag/SiO<sub>2</sub> after ultrasonication in water for (a) 15 and (b) 60 min.

35

40

45

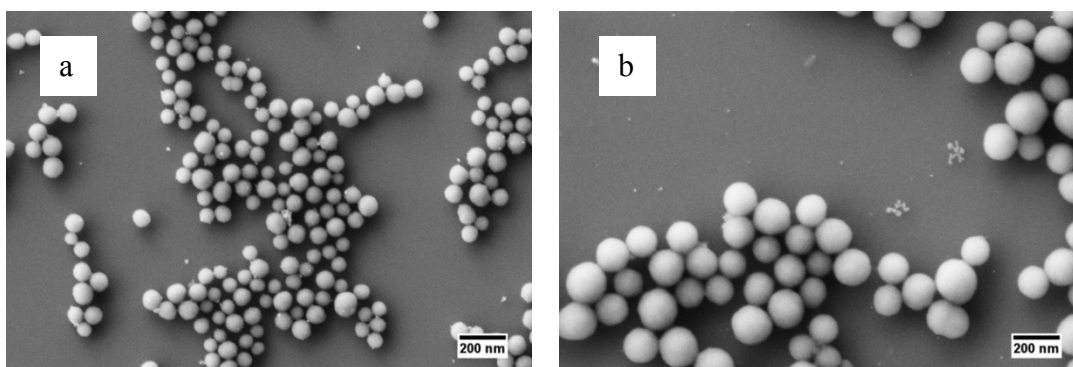

**Fig. S3** SEM images of Ag/SiO<sub>2</sub> prepared by borohydride reduction of silver acetate in (a) pure water and (b) pure THF.

5

10

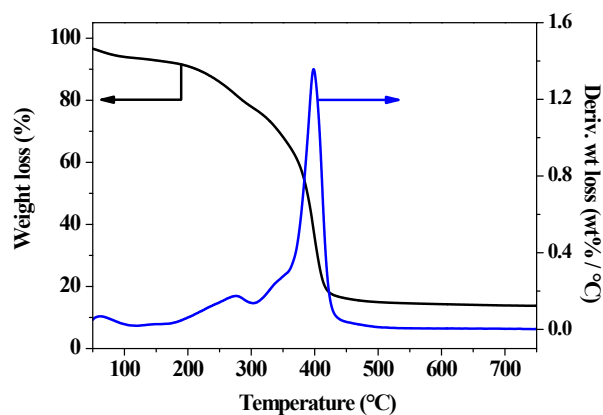

Fig. S4 TGA (black) and DTGA (blue) curves of MC(Ag/SiO<sub>2</sub>).

15

20

25

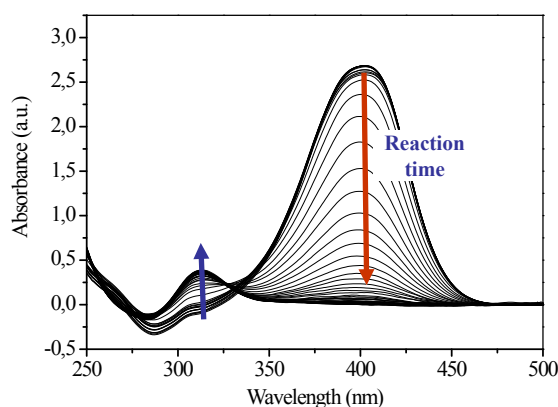

Fig. S5 Successive UV-Vis spectra taken after every minute during borohydride reduction of 4-NP catalysed by Ag/SiO<sub>2</sub> nanocatalyst. Initial reactant concentrations: [4-NP] = 0.125 mM, [NaBH<sub>4</sub>] = 1.5 M, [Ag] = 0.54 · 10<sup>-3</sup> mg/ml.

30

35

40

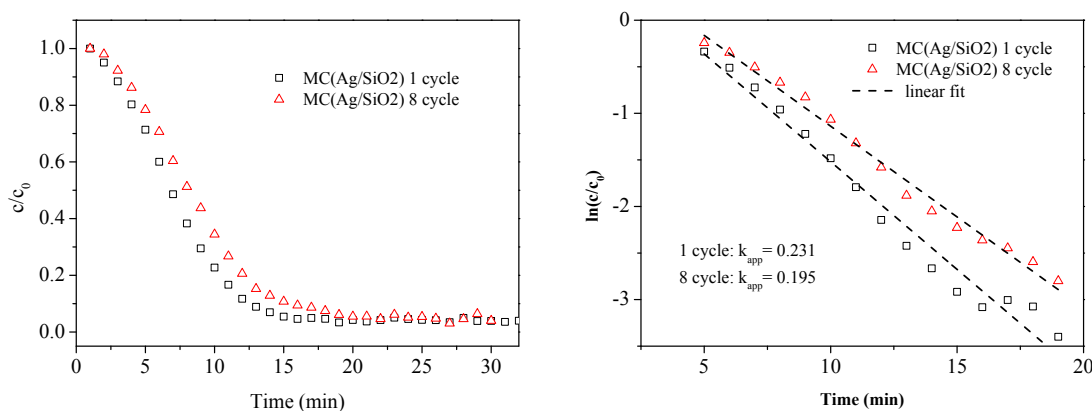

Fig. S6 Plots of  $c/c_0$  (a) and  $\ln(c/c_0)$  (b) versus time for the borohydride reduction of 4-NP catalysed by MC(Ag/SiO<sub>2</sub>) (data obtained for 1<sup>st</sup> and 8<sup>th</sup> successive cycles using the same portion of catalyst. [Ag] = 0.52 · 10<sup>-3</sup> mg/ml.

45 MC(Ag/SiO<sub>2</sub>) were used for several subsequent cycles of catalytic reduction of 4-nitrophenol. Reaction was carried out in centrifugation tube and conversion of 4-NP was assumed to be complete after full de-colorization of reaction mixture. After each cycle the catalyst was separated by centrifugation, supernatant was removed and new portion of 4-nitrophenol and NaBH<sub>4</sub> mixture was

---

added to the catalyst. First and last cycles were carried out in cuvette and monitored by UV-vis to analyse degree of 4-NP conversion and determine reaction rate constant. Figure S5 shows (a) depletion of 4-nitrophenol relative concentration ( $c/c_0$ ) versus time and (b)  $\ln(c/c_0)$  versus time obtained for the 1<sup>st</sup> and 8<sup>th</sup> cycles of catalytic reaction carried out with the same portion of catalyst ( $[Ag]_0=0.52 \cdot 10^{-3}$  5 mg/ml). Constants differ from each other for ~10% which might be due to incomplete transfer of catalyst from centrifugation tube into cuvette. Notably, our attempts to monitor reaction by UV-Vis during every successive cycle were failed after 4<sup>th</sup> cycle, probably due to catalyst loses during its transferring from centrifugation tube into cuvette.

10

15

20

25

30

35

40

45
